# Supplementary material
Source: MDPI journal article supplement (https://www.mdpi.com/1424-2818/14/4/278)
Supplement: s1 [file s1]

# Supplementary

## Herbivory by geese inhibits tidal freshwater wetland restoration success

Justus Jobe, Cairn Krafft, Mikaila Milton, and Keryn Gedan

Table S1. Plant species encountered in study plots. Species that were planted as part of the original restoration (Source: Hammerschlag et al. 2006. Five Years (2000-2004) of Post-Reconstruction Monitoring of Freshwater Tidal Wetlands in the Urban Anacostia River, Washington, D.C. USA). *Juncus effusus* (L.) and *Schoenoplectus pungens* (Vahl) Palla were also planted at the site, as plugs, but did not appear in the plot level data. *Z. aquatica* was planted by seed by Anacostia Watershed Society in the years 2004-2007 (pers. communication, Stephen McKindley-Ward, AWS).

| Latin name                                               | Common name            | Perennial or Annual | Planted or Volunteer |
|----------------------------------------------------------|------------------------|---------------------|----------------------|
| <i>Amaranthus cannabinus</i> (L.) J.D. Sauer             | tidalmarsh amaranth    | perennial           | volunteer            |
| <i>Bidens connata</i> Muhl. ex Willd.                    | purplestem beggarticks | annual              | volunteer            |
| <i>Bidens frondosa</i> (L.)                              | devil's beggartick     | annual              | volunteer            |
| <i>Bidens laevis</i> (L.) Britton, Sterns & Poggenb.     | smooth beggarticks     | annual              | volunteer            |
| <i>Cuscuta gronovii</i> Willd. ex Schult.                | scaldweed              | perennial           | volunteer            |
| <i>Echinochloa muricata</i> (P. Beauv.) Fernald          | rough barnyardgrass    | annual              | volunteer            |
| <i>Eclipta prostrata</i> (L.) L.                         | false daisy            | perennial           | volunteer            |
| <i>Impatiens capensis</i> Meerb.                         | jewelweed              | annual              | volunteer            |
| <i>Iris pseudacorus</i> L.                               | yellow flag            | perennial           | volunteer            |
| <i>Leersia oryzoides</i> (L.) Sw.                        | rice cut grass         | perennial           | volunteer            |
| <i>Lindernia dubia</i> (L.) Pennell                      | moistbank pimpernel    | perennial           | volunteer            |
| <i>Lycopus rubellus</i> Moench                           | taperleaf bugleweed    | perennial           | volunteer            |
| <i>Murdannia keisak</i> (Hassk.) Hand.-Mazz.             | Asian spiderwort       | perennial           | volunteer            |
| <i>Nuphar advena</i> (Aiton) W.T. Aiton <sup>^</sup>     | yellow pond-lily       | perennial           | planted, plug        |
| <i>Peltandra virginica</i> (L.) Schott                   | green arrow arum       | perennial           | planted, plug        |
| <i>Persicaria hydropiper</i> (L.) Opiz                   | marshpepper knotweed   | annual              | volunteer            |
| <i>Persicaria punctata</i> (Elliott) Small               | dotted smartweed       | annual              | volunteer            |
| <i>Phalaris arundinacea</i> L.                           | reed canary grass      | perennial           | volunteer            |
| <i>Pontederia cordata</i> Nutt.                          | pickerelweed           | perennial           | planted, plug        |
| <i>Sagittaria latifolia</i> Willd.                       | duck potato            | perennial           | planted, plug        |
| <i>Schoenoplectus tabernaemontani</i> (C.C. Gmel.) Palla | softstem bulrush       | perennial           | planted, plug        |
| <i>Typha latifolia</i> L.                                | broadleaf cattail      | perennial           | volunteer            |
| <i>Zizania aquatica</i> var. <i>aquatica</i> (L.)        | annual wildrice        | annual              | planted, seed        |

<sup>^</sup> since planted, taxonomy has been revised. In original report, listed as *Nuphar lutea*.

Table S2. Test statistics from *t*-tests of the difference between fenced and unfenced treatments of initially vegetated and unvegetated modules, for response variables total percent cover, species richness, Shannon-Wiener index, and annuals cover, for all years of the study. *p*-values were adjusted with the Bonferroni correction for multiple comparisons.

|             | Percent Cover                      |             |             |                   |             |             |
|-------------|------------------------------------|-------------|-------------|-------------------|-------------|-------------|
|             | Vegetated Plots                    |             |             | Unvegetated Plots |             |             |
|             | DF                                 | t-statistic | Adj p-value | DF                | t-statistic | Adj p-value |
| June 2009   | 7                                  | 1.30        | 0.233       | 7                 | 0.89        | 0.401       |
| August 2009 | 7                                  | -3.43       | 0.011       | 7                 | -1.40       | 0.204       |
| August 2010 | 7                                  | -3.21       | 0.015       | 7                 | -2.69       | 0.031       |
| August 2011 | 7                                  | -2.80       | 0.026       | 7                 | -4.41       | 0.003       |
| August 2012 | 7                                  | -4.06       | 0.005       | 7                 | -10.80      | <0.001      |
| August 2013 | 7                                  | -3.80       | 0.007       | 7                 | -16.20      | <0.001      |
| August 2014 | 7                                  | -4.21       | 0.004       | 7                 | -8.79       | <0.001      |
| August 2015 | 7                                  | -2.82       | 0.026       | 7                 | -7.36       | <0.001      |
|             | Percent Cover Comprised of Annuals |             |             |                   |             |             |
|             | Vegetated Plots                    |             |             | Unvegetated Plots |             |             |
|             | DF                                 | t-statistic | Adj p-value | DF                | t-statistic | Adj p-value |
| June 2009   | 7                                  | 0.91        | 0.391       | 7                 | 0.85        | 0.423       |
| August 2009 | 7                                  | -5.39       | 0.001       | 7                 | -1.46       | 0.187       |
| August 2010 | 7                                  | -2.88       | 0.024       | 7                 | -2.64       | 0.003       |
| August 2011 | 7                                  | -2.01       | 0.084       | 7                 | -2.26       | 0.058       |
| August 2012 | 7                                  | -3.40       | 0.012       | 7                 | -3.45       | 0.011       |
| August 2013 | 7                                  | -2.60       | 0.035       | 7                 | -2.13       | 0.070       |
| August 2014 | 7                                  | -2.95       | 0.021       | 7                 | -3.34       | 0.012       |
| August 2015 | 7                                  | -2.56       | 0.038       | 7                 | -2.70       | 0.031       |
|             | Species Richness                   |             |             |                   |             |             |
|             | Vegetated Plots                    |             |             | Unvegetated Plots |             |             |
|             | DF                                 | t-statistic | Adj p-value | DF                | t-statistic | Adj p-value |
| June 2009   | 7                                  | 0.36        | 0.732       | 7                 | 1.87        | 0.104       |
| August 2009 | 7                                  | -0.48       | 0.649       | 7                 | 0.00        | 1.000       |
| August 2010 | 7                                  | -2.12       | 0.072       | 7                 | -2.65       | 0.033       |
| August 2011 | 7                                  | -4.46       | 0.003       | 7                 | -3.99       | 0.005       |
| August 2012 | 7                                  | -4.47       | 0.003       | 7                 | -4.08       | 0.005       |
| August 2013 | 7                                  | -3.78       | 0.007       | 7                 | -7.74       | <0.001      |
| August 2014 | 7                                  | -4.64       | 0.002       | 7                 | -5.71       | <0.001      |
| August 2015 | 7                                  | -4.91       | 0.002       | 7                 | -6.70       | <0.001      |
|             | Shannon-Wiener Index               |             |             |                   |             |             |
|             | Vegetated Plots                    |             |             | Unvegetated Plots |             |             |
|             | DF                                 | t-statistic | Adj p-value | DF                | t-statistic | Adj p-value |
| June 2009   | 7                                  | -0.28       | 0.785       | 7                 | 1.00        | 0.351       |
| August 2009 | 7                                  | -1.51       | 0.174       | 7                 | 1.00        | 0.351       |
| August 2010 | 7                                  | -1.47       | 0.185       | 7                 | -2.50       | 0.041       |
| August 2011 | 7                                  | -3.04       | 0.019       | 7                 | -2.50       | 0.041       |
| August 2012 | 7                                  | -5.18       | 0.001       | 7                 | -3.62       | 0.009       |
| August 2013 | 7                                  | -3.96       | 0.005       | 7                 | -4.37       | 0.003       |
| August 2014 | 7                                  | -4.86       | 0.002       | 7                 | -4.68       | 0.002       |
| August 2015 | 7                                  | -4.80       | 0.002       | 7                 | -7.47       | <0.001      |
